# Supplementary material for: Peripheral body temperature rhythm is associated with suicide risk in major depressive disorder: a case-control study
Source: HighWire-hosted journal article supplement (doi:10.1136/gpsych-2020-100219), 2021-02-01
Supplement: gpsych-2020-100219supp001_data_supplement.pdf [file gpsych-2020-100219supp001_data_supplement.pdf]

Supplement Table 1. Comparison of clinical and peripheral body temperature of MDD patients before and after treatment.

| Variables                                      | MDD Patients (N = 24)      |                   |          |                  |                               |                  |          |                  | Normal Participants (N = 15) |                 |          |          |
|------------------------------------------------|----------------------------|-------------------|----------|------------------|-------------------------------|------------------|----------|------------------|------------------------------|-----------------|----------|----------|
|                                                | WITH suicide risk (N = 14) |                   |          |                  | WITHOUT suicide risk (N = 10) |                  |          |                  |                              |                 |          |          |
|                                                | Before treatment           | After treatment   | <i>T</i> | <i>P</i>         | Before treatment              | After treatment  | <i>T</i> | <i>P</i>         | Before treatment             | After treatment | <i>T</i> | <i>P</i> |
| <b>Clinical characteristics</b>                |                            |                   |          |                  |                               |                  |          |                  |                              |                 |          |          |
| HAMA, Median (IQR)                             | 15.0 (12.8, 18.0)          | 9.5 (5.8, 14.0)   | 2.51     | <b>0.026</b>     | 13.0 (10.5, 15.0)             | 6.5 (5.8, 8.3)   | 3.94     | <b>0.003</b>     | 2.0 (1.0, 3.0)               | 2.0 (1.0,3.0)   | -0.86    | 0.405    |
| HAMD-17, Median (IQR)                          | 25.5 (22.8, 29.0)          | 14.0 (10.0, 17.3) | 7.35     | <b>&lt;0.001</b> | 20.5 (16.9, 22.3)             | 10.0 (7.8, 11.0) | 5.87     | <b>&lt;0.001</b> | 1.0 (0.0, 2.0)               | 1.0 (1.0, 3.0)  | 1.38     | 0.189    |
| PHQ-9, Median (IQR)                            | 22.0 (18.5, 23.3)          | 13.5 (7.7, 19.3)  | 3.51     | <b>0.004</b>     | 13.0 (10.8, 13.5)             | 4.0 (1.8, 7.0)   | 7.89     | <b>&lt;0.001</b> | 2.0 (0.0, 3.0)               | 2.0 (1.0, 2.0)  | 0.32     | 0.758    |
| MDQ, Median (IQR)                              | 3.0 (2.0, 4.0)             | 2.0 (1.0, 3.0)    | 1.88     | 0.082            | 2.5 (1.8, 3.0)                | 2.0 (2.0, 2.0)   | 1.41     | <b>0.193</b>     | 1.0 (0.0, 2.0)               | 2.0 (1.0, 2.0)  | -1.24    | 0.235    |
| PSQI, Median (IQR)                             | 13.5 (11.0, 17.3)          | 11.5 (7.8, 12.8)  | 2.93     | <b>0.012</b>     | 12.0 (6.8, 14.3)              | 8.5 (4.8, 11.8)  | 3.27     | <b>0.010</b>     | 3.0 (2.0, 5.0)               | 3.0 (2.0, 5.0)  | 0.43     | 0.670    |
| <b>Features of peripheral body temperature</b> |                            |                   |          |                  |                               |                  |          |                  |                              |                 |          |          |
| <i>Mesor</i> , Mean (SD)                       | 36.08 (0.31)               | 36.00 (0.35)      | 1.29     | 0.220            | 36.20 (0.29)                  | 36.31 (0.29)     | -1.55    | 0.156            | 35.92 (0.34)                 | 36.02 (0.34)    | -1.66    | 0.118    |
| <i>Amplitude</i> , Mean (SD)                   | 0.37 (0.15)                | 0.27 (0.17)       | 1.77     | 0.100            | 0.45 (0.25)                   | 0.36 (0.17)      | 0.83     | 0.428            | 0.30 (0.16)                  | 0.31 (0.15)     | -0.11    | 0.916    |
| <i>Phase-delay</i> , Mean (SD)                 | 5.11 (3.44)                | 4.06 (1.93)       | 1.55     | 0.146            | 2.39 (2.14)                   | 3.01 (2.09)      | -0.86    | 0.412            | 3.45 (1.84)                  | 2.82 (2.00)     | -1.05    | 0.311    |
| <i>Nadir</i> , Mean (SD)                       | 4:50 (1:52)                | 7:23 (4:19)       | 1.92     | 0.077            | 5:05 (6:02)                   | 6:11 (6:57)      | -0.37    | 0.701            | 6:19 (4:36)                  | 5:47 (5:28)     | 0.31     | 0.761    |

Abbreviation: MDD: Major depressive disorder; SD: standard deviation. IQR: interquartile range.

The clinical characteristics and temperature characteristics were analyzed by *Paired-samples T-test*, statistic value: *Z*; *P*: baseline vs. follow-up. The differences were determined with significance at 0.05 level and statistically significant results in the table were boldface.

Supplement Table 2. Association between peripheral body temperature and factor scores of HAMD-17 of MDD patients before and after treatment.

|                              | Anxiety/<br>Somatoform |       | Weight |       | Cognitive<br>impairment |              | Retardation  |             | Insomnia      |              | Total score |       |
|------------------------------|------------------------|-------|--------|-------|-------------------------|--------------|--------------|-------------|---------------|--------------|-------------|-------|
| Before treatment<br>(N = 41) | R                      | P     | R      | P     | R                       | P            | R            | R           | R             | P            | R           | P     |
| Mesor                        | 0.047                  | 0.779 | 0.028  | 0.863 | -0.075                  | 0.649        | <b>0.347</b> | <b>0.03</b> | 0.163         | 0.321        | 0.16        | 0.329 |
| Amplitude                    | -0.029                 | 0.859 | 0.077  | 0.642 | -0.028                  | 0.867        | -0.191       | 0.244       | <b>-0.346</b> | <b>0.031</b> | 0.203       | 0.215 |
| Phase-delay                  | 0.123                  | 0.457 | 0.119  | 0.472 | <b>0.434</b>            | <b>0.006</b> | 0.051        | 0.756       | 0.080         | 0.629        | 0.316       | 0.050 |
| Nadir                        | 0.070                  | 0.670 | -0.149 | 0.365 | -0.064                  | 0.701        | 0.068        | 0.682       | <b>-0.332</b> | <b>0.039</b> | -0.086      | 0.601 |
| After treatment<br>(N = 24)  | R                      | P     | R      | P     | R                       | P            | R            | P           | R             | P            | R           | P     |
| Mesor                        | 0.100                  | 0.657 | -0.034 | 0.88  | -0.181                  | 0.420        | -0.014       | 0.951       | -0.237        | 0.289        | -0.092      | 0.685 |
| Amplitude                    | -0.151                 | 0.502 | -0.399 | 0.066 | -0.182                  | 0.417        | -0.214       | 0.339       | -0.250        | 0.263        | -0.310      | 0.161 |
| Phase-delay                  | -0.009                 | 0.970 | 0.162  | 0.472 | 0.090                   | 0.692        | 0.121        | 0.592       | 0.113         | 0.616        | -0.114      | 0.613 |
| Nadir                        | -0.221                 | 0.323 | -0.227 | 0.309 | 0.289                   | 0.192        | -0.082       | 0.718       | -0.035        | 0.876        | -0.072      | 0.749 |

Abbreviation: MDD: Major depressive disorder; NC: Normal control; R: correlation coefficient; P: P Value.  
The association were analyzed by *Spearman* correlation *adjusted* by age and sex. The differences were determined with significance at 0.05 level and statistically significant results in the table were boldface.

Supplement Table 3. Peripheral temperature characteristic of female participants during different menstruation period before treatment.

| Variables              | Female MDD (N = 32)      |                              | Female NC (N = 12)      |                             | Z (P) <sup>a</sup>   | Z (P) <sup>b</sup> | Z (P) <sup>c</sup> | Z (P) <sup>d</sup>   |
|------------------------|--------------------------|------------------------------|-------------------------|-----------------------------|----------------------|--------------------|--------------------|----------------------|
|                        | Luteal phase<br>(N = 14) | Follicular phase<br>(N = 18) | Luteal phase<br>(N = 5) | Follicular phase<br>(N = 7) |                      |                    |                    |                      |
| Mesor, Mean (SD)       | 36.38 (0.21)             | 36.11 (0.29)                 | 36.03 (0.56)            | 35.75 (0.26)                | <b>-2.49 (0.011)</b> | -1.54 (0.149)      | -1.30 (0.219)      | <b>-2.33 (0.017)</b> |
| Amplitude, Mean (SD)   | 0.30 (0.13)              | 0.44 (0.18)                  | 0.32 (0.11)             | 0.34 (0.19)                 | 1.88 (0.059)         | -0.16 (0.876)      | -0.28 (0.823)      | -1.09 (0.297)        |
| Phase-delay, Mean (SD) | 4.11 (2.39)              | 3.52 (2.03)                  | 2.80 (2.10)             | 3.44 (1.97)                 | -1.22 (0.235)        | 0.57 (0.639)       | 1.57 (0.156)       | -0.06 (0.976)        |
| Nadir, Mean (SD)       | 5:40 (3:24)              | 4:07 (2:57)                  | 9:05 (4:10)             | 6:05 (7:09)                 | -1.71 (0.091)        | -1.38 (0.202)      | -1.48 (0.130)      | 0.36 (0.745)         |

Abbreviation: MDD: Major depressive disorder; NC: Normal control; SD: standard deviation.

The temperature characteristics were analyzed by *Mann-Whitney U*, statistic value: Z;

t/Z (P)<sup>a</sup>: Luteal phase vs. Follicular phase in MDD; t/Z (P)<sup>b</sup>: Luteal phase vs. Follicular phase in NC; t/Z (P)<sup>c</sup>: MDD vs. NC during Luteal phase;

t/Z (P)<sup>d</sup>: MDD vs. NC during Follicular phase. The differences were determined with significance at 0.05 level and statistically significant results in the table were boldface.

**Supplement Table 4. Demographic characteristics and features of peripheral body temperature before treatment between MDD patients being followed-up and dropped-out.**

| Assessments                                    | Followed up (N = 24) | Dropped out (N = 17) | $\chi^2/Z$ | P     |
|------------------------------------------------|----------------------|----------------------|------------|-------|
| <b>Demographic characteristics</b>             |                      |                      |            |       |
| Age (years), Mean (SD)                         | 30.3 (4.8)           | 32.6 (8.0)           | 0.70       | 0.482 |
| Height (cm), Mean (SD)                         | 163.9 (6.8)          | 164.9 (3.8)          | -1.11      | 0.267 |
| Weight (kg), Mean (SD)                         | 57.4 (11.1)          | 60.5 (11.2)          | -0.92      | 0.353 |
| BMI (kg/m <sup>2</sup> ), Mean (SD)            | 21.3 (3.6)           | 22.3 (3.5)           | -0.98      | 0.327 |
| Education (years), Median (Q1, Q3)             | 16 (15, 16)          | 16 (14, 16)          | -0.43      | 0.667 |
| Sex, Male, No. (%)                             | 5 (20.0%)            | 4 (23.5%)            | 0.04       | 0.837 |
| <b>Clinical characteristics</b>                |                      |                      |            |       |
| HAMA, Median (IQR)                             | 14.5 (12.0, 17.3)    | 14.0 (12.0, 16.0)    | -0.17      | 0.863 |
| HAMD-17, Median (IQR)                          | 23.0 (21.0, 26.0)    | 25.0 (19.3, 27.5)    | -0.45      | 0.652 |
| PHQ-9, Median (IQR)                            | 17.0 (13.0, 23.0)    | 18.0 (16.0, 22.0)    | -0.85      | 0.396 |
| MDQ, Median (IQR)                              | 3.0 (2.0, 3.0)       | 3.0 (1.5, 4.0)       | -0.10      | 0.924 |
| PSQI, Median (IQR)                             | 12.0 (10.3, 16.5)    | 13.0 (12.0, 15.5)    | -0.48      | 0.632 |
| <b>Features of peripheral body temperature</b> |                      |                      |            |       |
| Mesor, Mean (SD)                               | 36.13 (0.30)         | 36.29 (0.25)         | -1.83      | 0.068 |
| Amplitude, Mean (SD)                           | 0.41 (0.20)          | 0.35 (0.10)          | -1.32      | 0.186 |
| Phase-delay, Mean (SD)                         | 3.98 (2.20)          | 3.89 (1.98)          | 0.13       | 0.895 |
| Nadir, Mean (SD)                               | 04:56 (04:02)        | 05:19 (3:30)         | -0.40      | 0.691 |

Abbreviation: MDD: Major depressive disorder; NC: Normal control; SD: standard deviation.

IQR: interquartile range.

Sex was calculated by *Chi-square test*, statistic value:  $\chi^2$ ; Others were calculated by *Mann-Whitney U*, statistic value: Z; P: Followed-up vs. Dropped out. The differences were determined with significance at 0.05 level and statistically significant results in the table were boldface.
